# Supplementary material for: Eimeria bovis infection modulates endothelial host cell cholesterol metabolism for successful replication
Source: PubMed Central journal article supplement (PMC4579583; doi:10.1186/s13567-015-0230-z), 2015-09-23

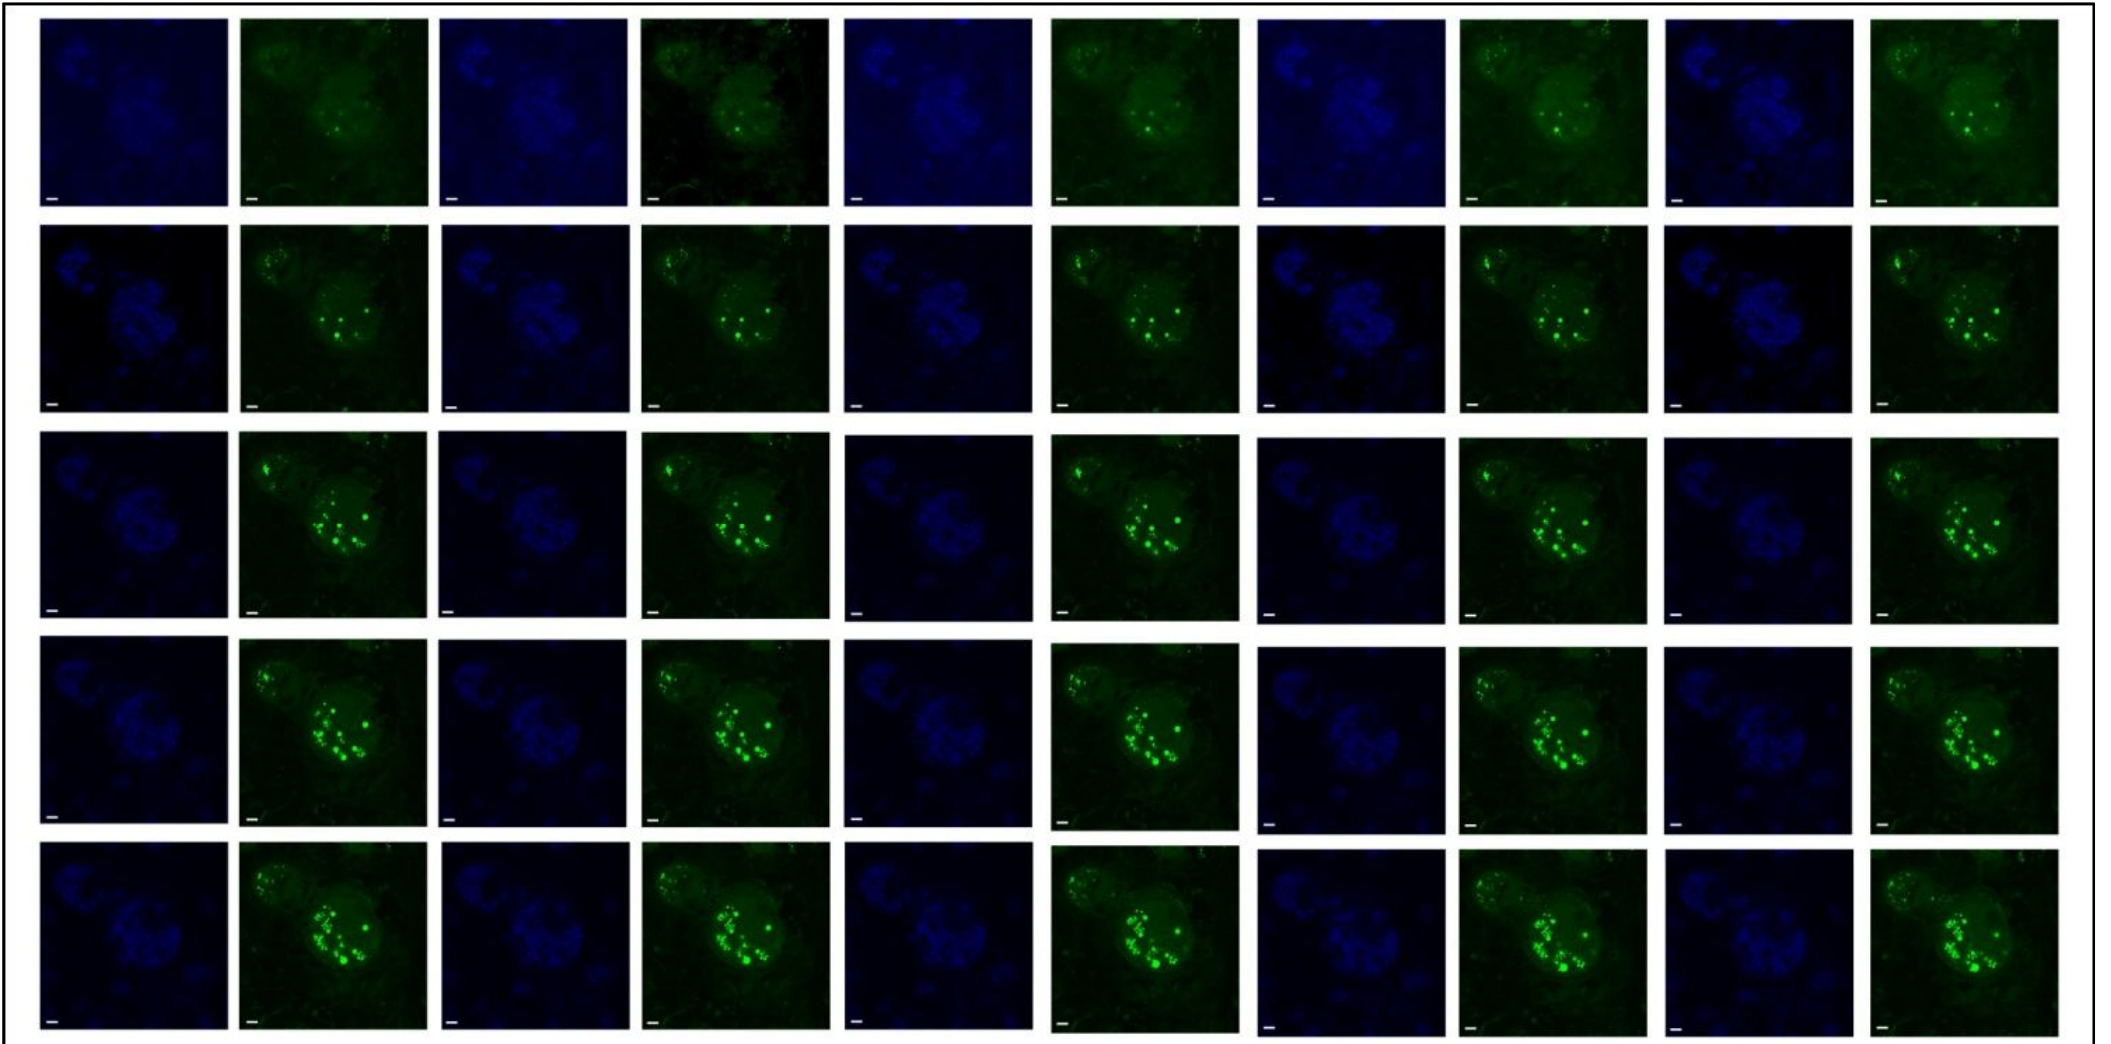

Supplement: 13567_2015_230_MOESM1_ESM.pdf [file 13567_2015_230_MOESM1_ESM.pdf]
